# Supplementary material for: Discovery of N-substituted-2-oxoindolin benzoylhydrazines as c-MET/SMO modulators in EGFRi-resistant non-small cell lung cancer
Source: Royal Society of Chemistry journal article supplement (doi:10.1039/d4md00553h), 2024-10-03
Supplement: d4md00553h1.pdf [file d4md00553h1.pdf]

## Electronic Supporting Information

# Discovery of N-Substituted-2-Oxoindolin Benzoylhydrazines as c-MET/SMO Modulators in EGFRi-Resistant Non-Small Cell Lung Cancer

Stefano Tomassi,<sup>a,e†</sup> Benito Natale,<sup>a†</sup> Michele Roggia,<sup>a</sup> Luisa Amato,<sup>b</sup> Caterina De Rosa,<sup>b</sup> Carminia Maria Della Corte,<sup>b</sup> Emma Baglini,<sup>c</sup> Giorgio Amendola,<sup>a</sup> Anna Messere,<sup>a</sup> Salvatore Di Maro,<sup>a</sup> Elisabetta Barresi,<sup>d</sup> Federico Da Settimo,<sup>d</sup> Maria Letizia Trincavelli,<sup>d</sup> Fortunato Ciardiello,<sup>b</sup> Sabrina Taliani,<sup>d\*</sup> Floriana Morgillo,<sup>b\*\*</sup> and Sandro Cosconati<sup>a\*\*\*</sup>

<sup>a</sup> DiSTABiF, University of Campania “Luigi Vanvitelli”, Via Vivaldi 43, 81100, Caserta, Italy.

<sup>b</sup> Department of Precision Medicine, University of Campania “L. Vanvitelli”, Via Pansini, 5, 80138 Naples, Italy.

<sup>c</sup> CNR IFC, Institute of Clinical Physiology, National Research Council of Italy, CNR Research Area, Via G. Moruzzi 1, Pisa 56124, Italy.

<sup>d</sup> Department of Pharmacy, University of Pisa, Via Bonanno 6, 56126, Pisa, Italy.

<sup>e</sup> Department of Life Science, Health, and Health Professions, LINK Campus University, Via del Casale di San Pio V, 44, 00165, Rome, Italy

### Table of contents

|                                                                                                                                                 |            |
|-------------------------------------------------------------------------------------------------------------------------------------------------|------------|
| <b>Figure S1.</b> Predicted binding modes of <b>3</b> .                                                                                         | <b>S1</b>  |
| <b>Figure S2.</b> MD L-RMSD plots.                                                                                                              | <b>S2</b>  |
| <b>Figure S3.</b> MD protein-ligand interaction histogram                                                                                       | <b>S3</b>  |
| <b>Table S1.</b> Description of the employed 20 Tyrosine Kinases.                                                                               | <b>S3</b>  |
| <b>NMR spectra</b> of selected compounds <b>3</b> , <b>6</b> , <b>10</b> , and <b>25</b> .                                                      | <b>S6</b>  |
| <b>Figure S4.</b> SMO Binding curve on SMO receptor of <b>3</b> , <b>5</b> , <b>10</b> , and <b>25</b> .                                        | <b>S14</b> |
| <b>Figure S5.</b> MTT Cell viability Assay for HCC827 and PC9 cell lines treated with Gefitinib and Osimertinib.                                | <b>S15</b> |
| <b>Figure S6.</b> MTT Cell viability assay on HCC827-GR and PC9-OR cell lines treated with the combination of the four compounds plus the TKIs. | <b>S16</b> |
| <b>Figure S7.</b> Western Blot raw gels for Figure 4 in the main text.                                                                          | <b>S17</b> |
| <b>Figure S8.</b> Western Blot raw gels using HCC827-GR cell lines for Figure 6 in the main text.                                               | <b>S17</b> |
| <b>Figure S9.</b> Western Blot raw gels using PC9-OR cell lines for Figure 6 in the main text.                                                  | <b>S18</b> |
| <b>Figure S10.</b> Annexin V/Propidium Iodide Apoptosis assay of Figure 7 in the main text.                                                     | <b>S18</b> |
| <b>Figure S11.</b> Western Blot raw gels using PC9-OR cell lines for Figure 7 in the main text.                                                 | <b>S19</b> |
| <b>Figure S12.</b> Western Blot raw gels using HCC827-GR cell lines for Figure 7 in the main text.                                              | <b>S19</b> |

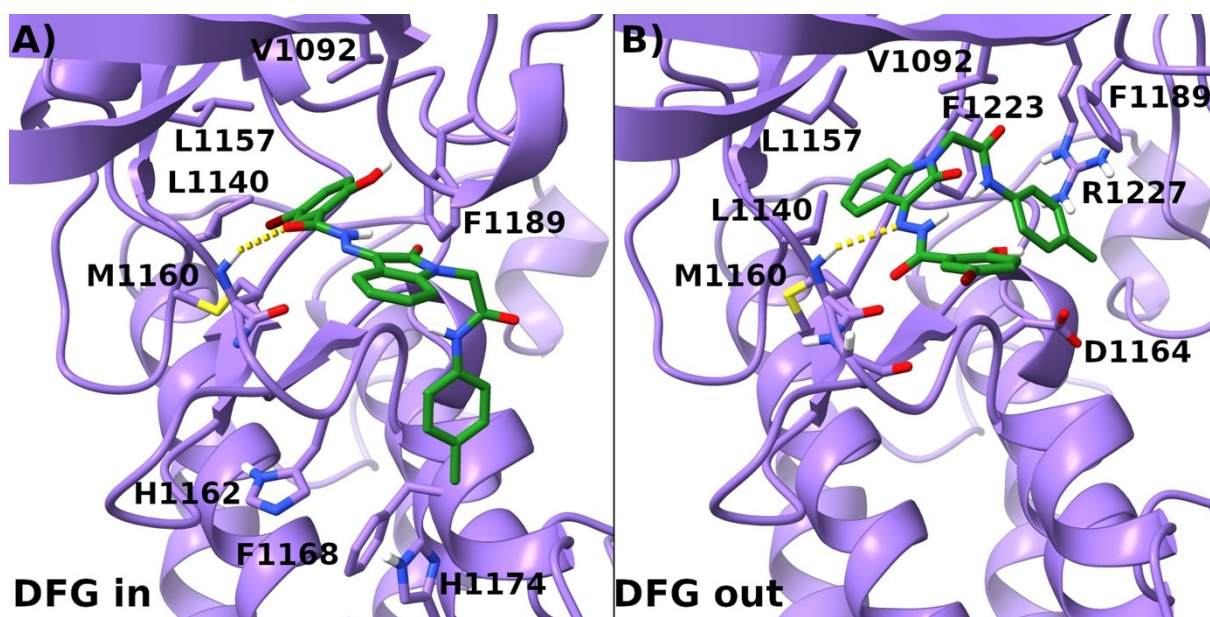

**Figure S1.** Predicted binding mode of **3** in complex with DFG-in (A) and DFG-out (B) conformation of c-MET, respectively. The ligand and receptor are in green sticks and purple sticks and ribbons, respectively. H-bonds are represented as dashed yellow lines.

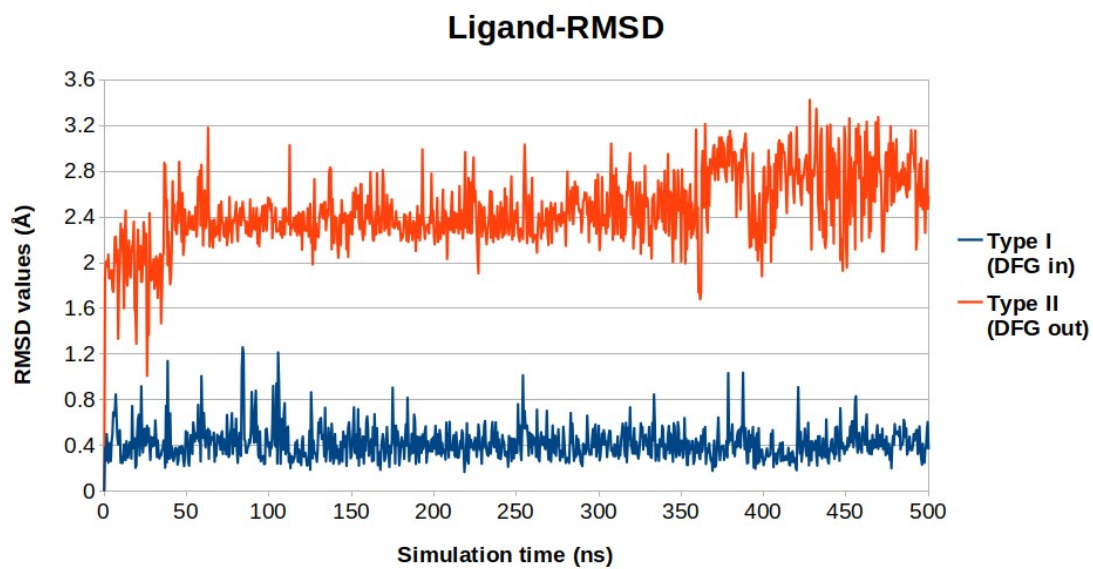

**Figure S2.** RMSD (Å) plot over simulation time (ns) of **3** in complex with DFG in (blue line) and DFG out (orange line) conformation of c-MET.

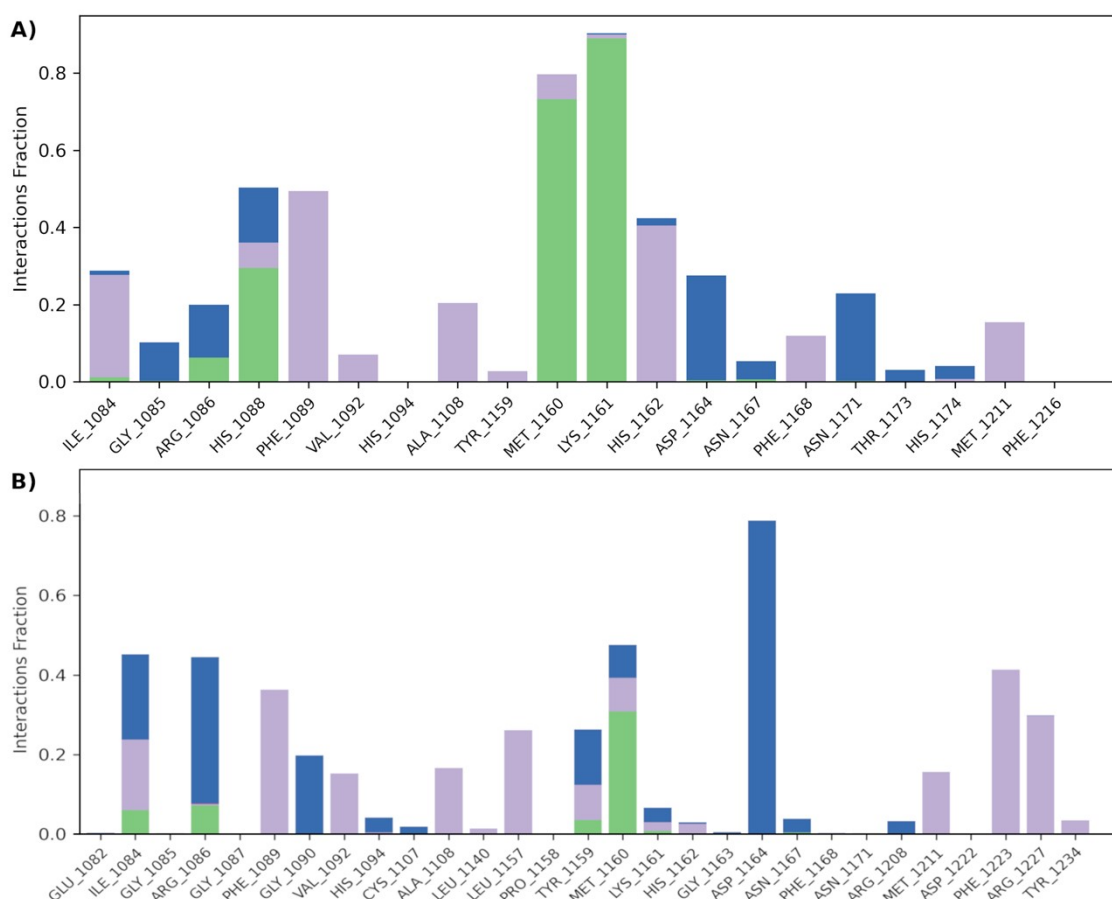

**Figure S3.** Histogram of protein-ligand interactions fraction of the 500 ns long MD simulation for **3** in complex with DFG in (A) and DFG out (B) conformations of c-MET, respectively. H-bonds are in green, hydrophobic contacts are in purple, and water-mediated interactions are in blue.

**Table S1.** Description of the employed 20 kinases.

| TK        | Description                                                                                                                                                                                                                                                  |
|-----------|--------------------------------------------------------------------------------------------------------------------------------------------------------------------------------------------------------------------------------------------------------------|
| ABL(ABL1) | Full-length human ABL [2-1130(end) amino acids of accession number NP_005148.2] was expressed as N-terminal His-tagged protein (126 kDa) using baculovirus expression system. His-tagged ABL was purified by using Ni-NTA affinity chromatography.           |
| CSK       | Full-length human CSK [1-450(end) amino acids of accession number NP_004374.1] was expressed as N-terminal GST-fusion protein (78 kDa) using baculovirus expression system. GST-CSK was purified by using glutathione sepharose chromatography.              |
| EGFR      | Human EGFR, cytoplasmic domain [669-1210(end) amino acids of accession number NP_005219.2] was expressed as N-terminal GST-fusion protein (89 kDa) using baculovirus expression system. GST-EGFR was purified by using glutathione sepharose chromatography. |
| EPHA2     | Human EPHB4, cytoplasmic domain [577-987(end) amino acids of accession number NP_004435.3] was expressed as N-terminal GST-protein (73 kDa) using baculovirus expression system. GST-EPHB4 was purified by using glutathione sepharose chromatography.       |
| FGFR1     | Human FGFR1, cytoplasmic domain [398-822(end) amino acids of accession number NP_075598.2] was expressed as N-terminal GST-fusion protein (75 kDa) using baculovirus expression system. GST-FGFR1 was                                                        |

|                         |                                                                                                                                                                                                                                                                                               |
|-------------------------|-----------------------------------------------------------------------------------------------------------------------------------------------------------------------------------------------------------------------------------------------------------------------------------------------|
|                         | purified by using glutathione sepharose chromatography.                                                                                                                                                                                                                                       |
| FLT3                    | Human FLT3, cytoplasmic domain [564-993(end) amino acids of accession number NP_004110.2] was expressed as N-terminal GST-fusion protein (77 kDa) using baculovirus expression system. GST-FLT3 was purified by using glutathione sepharose chromatography.                                   |
| IGF1R                   | Human IGF1R, cytoplasmic domain [959-1367(end) amino acids of accession number NP_000866.1] was expressed as N-terminal GST-fusion protein (73 kDa) using baculovirus expression system. GST-IGF1R was purified by using glutathione sepharose chromatography.                                |
| ITK                     | Full-length human ITK [2-620(end) amino acids of accession number NP_005537.3] was expressed as N-terminal GST-fusion protein (99 kDa) using baculovirus expression system. GST-ITK was purified by using glutathione sepharose chromatography.                                               |
| JAK3                    | Human JAK3, catalytic domain [795-1124(end) amino acids of accession number NP_000206.2] was expressed as N-terminal His-tagged protein (41 kDa) using baculovirus expression system. His-tagged JAK3 was purified by using Ni-NTA affinity chromatography and gel filtration chromatography. |
| KDR                     | Human KDR, cytoplasmic domain [790-1356(end) amino acids of accession number NP_002244.1] was expressed as N-terminal GST-fusion protein (90 kDa) using baculovirus expression system. GST-KDR was purified by using glutathione sepharose chromatography.                                    |
| LCK                     | Full-length human LCK [1-509(end) amino acids of accession number NP_005347.2] was expressed as N-terminal GST-fusion protein (85 kDa) using baculovirus expression system. GST-LCK was purified by using glutathione sepharose chromatography.                                               |
| c-MET                   | Human MET, cytoplasmic domain [956-1390(end) amino acids of accession number NP_000236.2] was expressed as N-terminal GST-fusion protein (76 kDa) using baculovirus expression system. GST-MET was purified by using glutathione sepharose chromatography.                                    |
| PDGFR $\alpha$ (PDGFRA) | Human PDGFR $\alpha$ , cytoplasmic domain [550-1089(end) amino acids of accession number NP_006197.1] was expressed as N-terminal GST-fusion protein (89 kDa) using baculovirus expression system. GST-PDGFR $\alpha$ was purified by using glutathione sepharose chromatography.             |
| PYK2(PTK2B)             | Full-length human PYK2 [1-967(end) amino acids of accession number NP_775267.1] was expressed as N-terminal GST-fusion protein (138 kDa) using baculovirus expression system. GST-PYK2 was purified by using glutathione sepharose chromatography.                                            |
| SRC                     | Full-length human SRC [1-536(end) amino acids of accession number NP_005408.1] was expressed as N-terminal GST-fusion protein (87 kDa) using baculovirus expression system. GST-SRC was purified by using glutathione sepharose chromatography.                                               |
| SYK                     | Full-length human SYK [1-635(end) amino acids of accession number NP_003168.2] was expressed as N-terminal GST-fusion protein (99 kDa) using baculovirus expression system. GST-SYK was purified by using glutathione sepharose chromatography.                                               |
| TIE2(TEK)               | Human TIE2, cytoplasmic domain [771-1124(end) amino acids of accession number NP_000450.1] was expressed as N-terminal GST-fusion protein (68 kDa) using baculovirus expression system. GST-TIE2 was purified by using glutathione sepharose chromatography.                                  |
| TRKA(NTRK1)             | Human TRKA, cytoplasmic domain [436-790(end) amino acids of                                                                                                                                                                                                                                   |

|       |                                                                                                                                                                                                                                                              |
|-------|--------------------------------------------------------------------------------------------------------------------------------------------------------------------------------------------------------------------------------------------------------------|
|       | accession numberNP_001012331.1] was expressed as N- terminal GST-fusion protein (67 kDa) usingbaculovirus expression system. GST-TRKA was purified by using glutathione sepharosechromatography                                                              |
| TYRO3 | Human TYRO3, cytoplasmic domain of [453-890(end) amino acids of accession numberNP_006284.2] was expressed as N-terminal GST fusion protein (76 kDa) usingbaculovirus expression system. GST-TYRO3 was purified by using glutathione sepharosechromatography |

NMR spectra.

Compound (3)  $^1\text{H}$  NMR (400 MHz,  $\text{DMSO-}d_6$ )

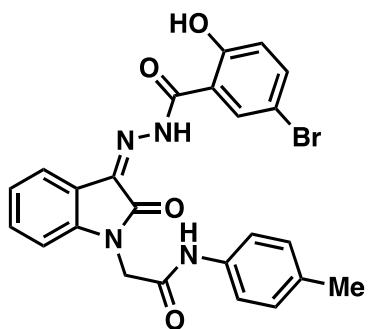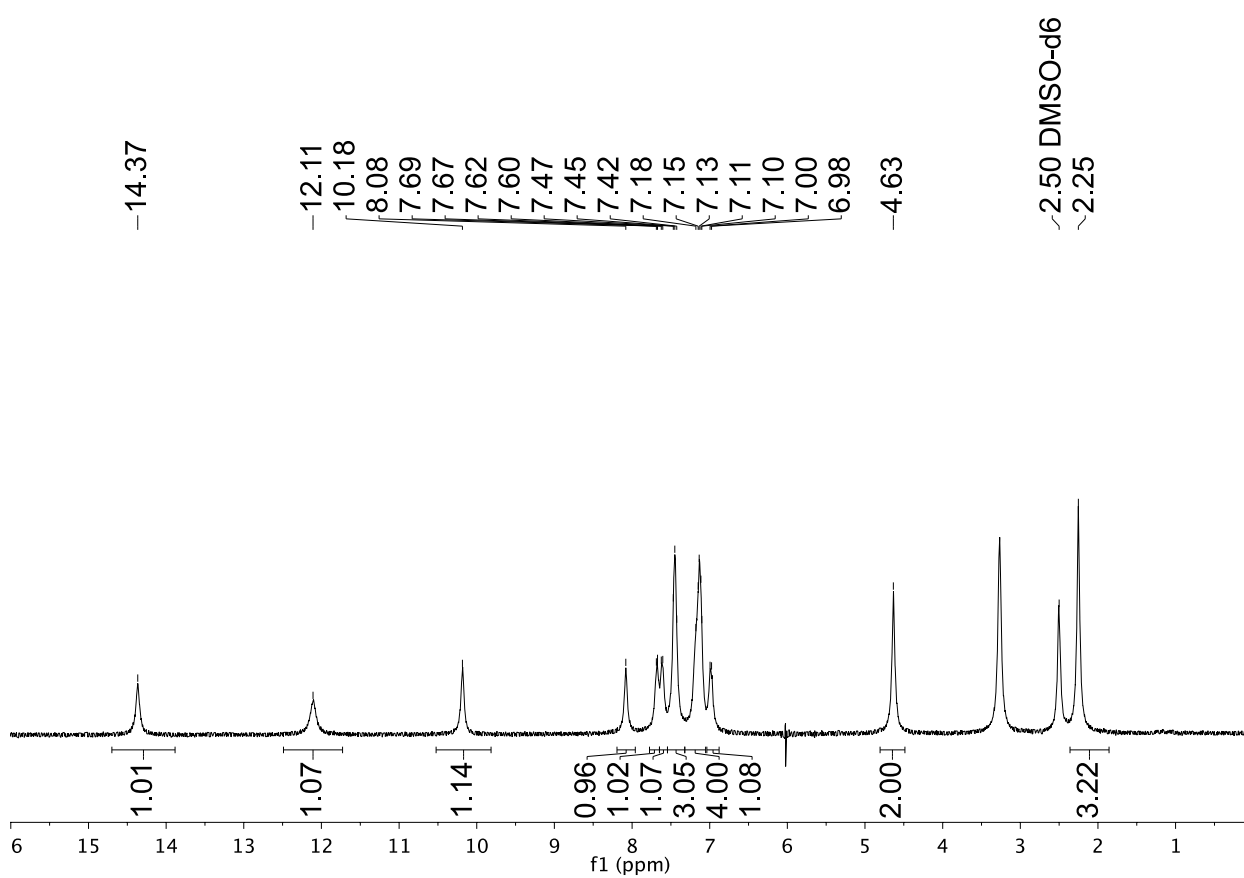

Compound (3) <sup>13</sup>C NMR (101 MHz, DMSO-d<sub>6</sub>)

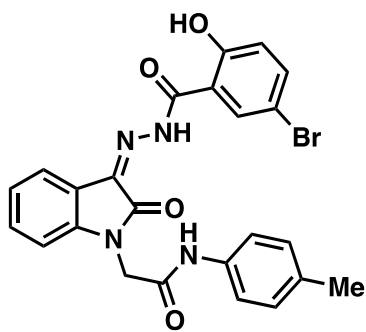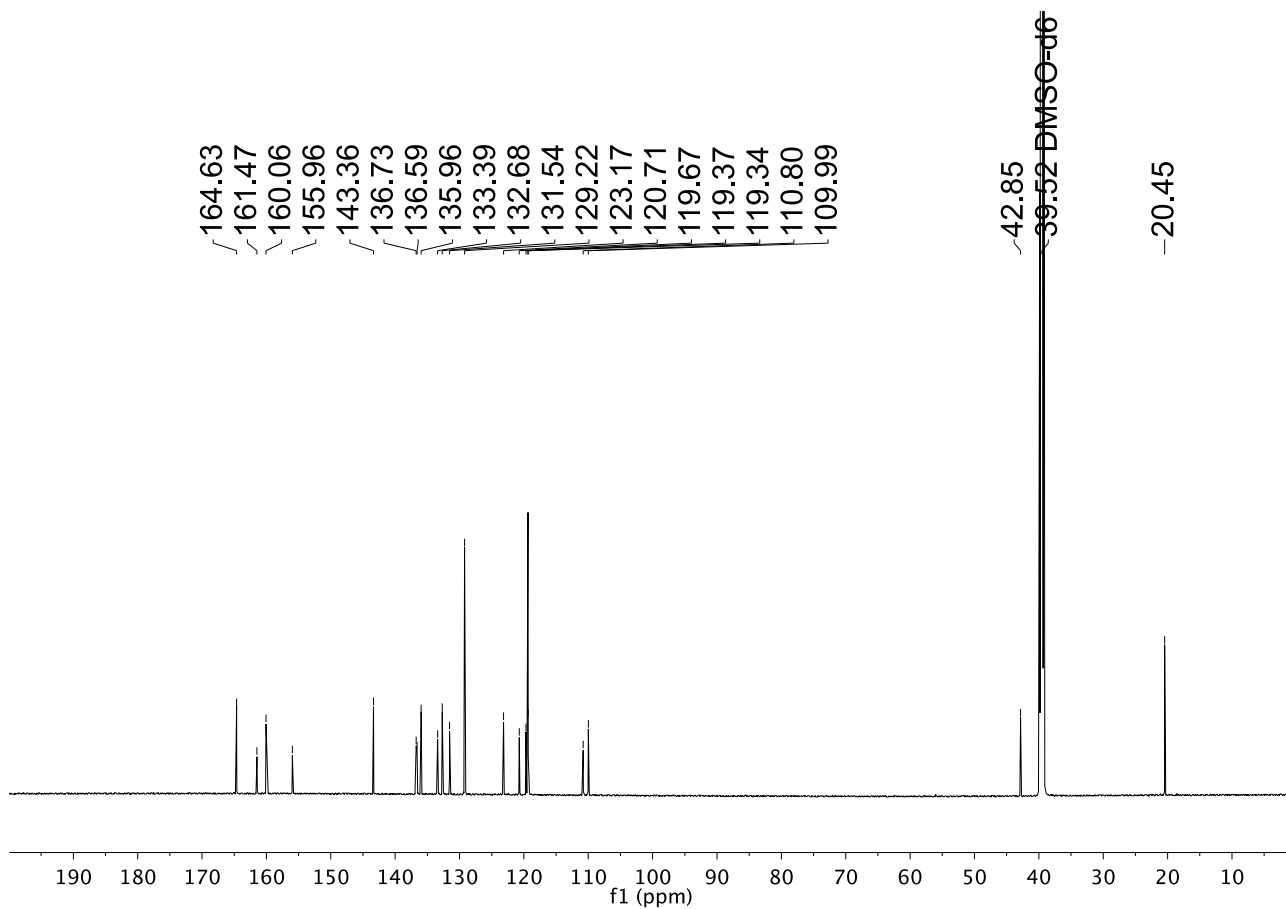



Compound (6) <sup>1</sup>H NMR (400 MHz, DMSO-d<sub>6</sub>)

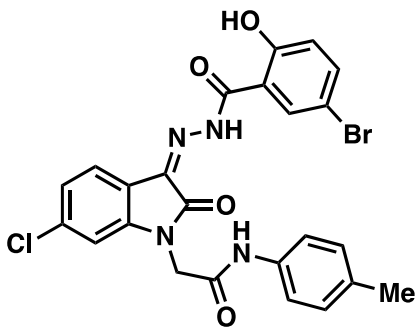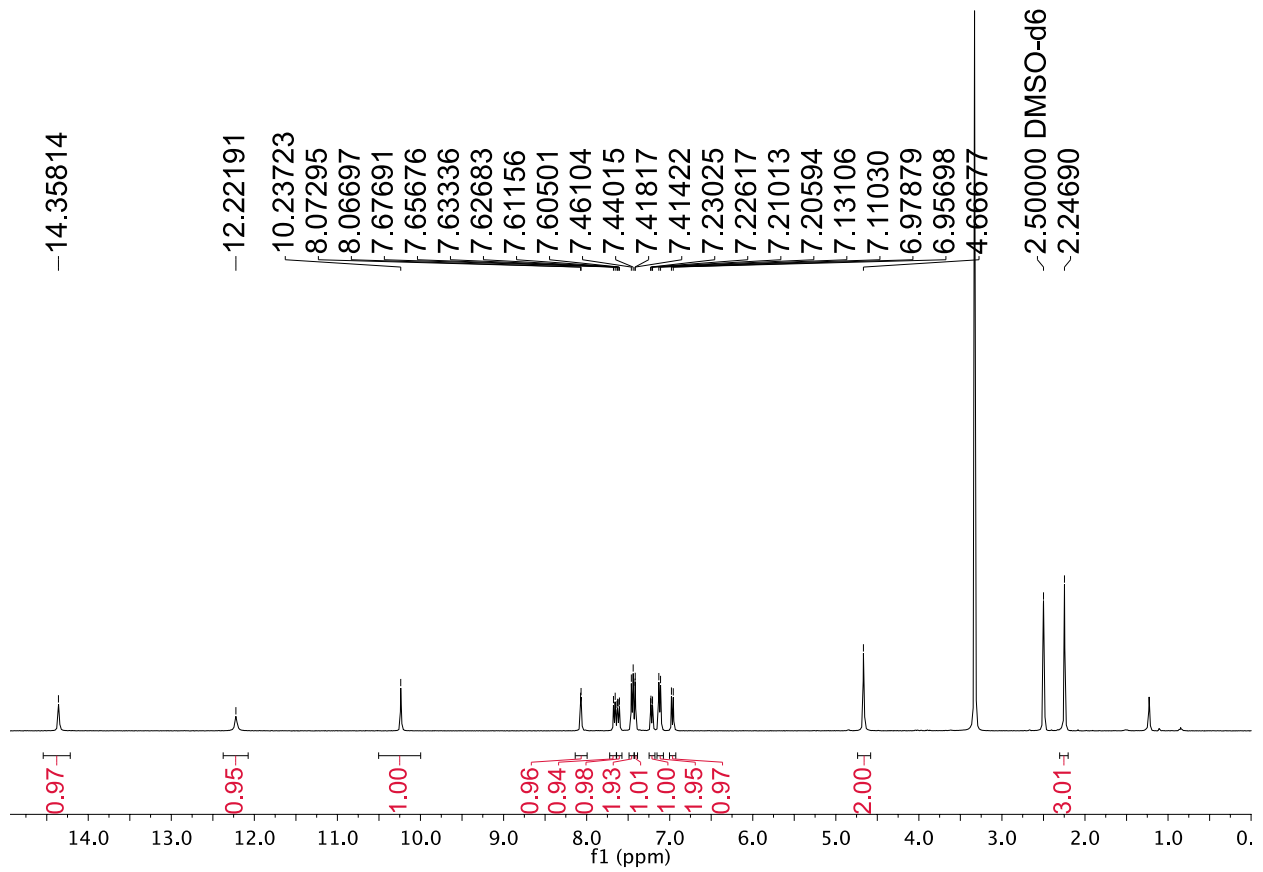

Compound (6)  $^{13}\text{C}$  NMR (101 MHz,  $\text{DMSO-}d_6$ )

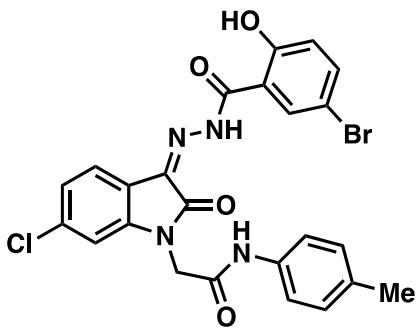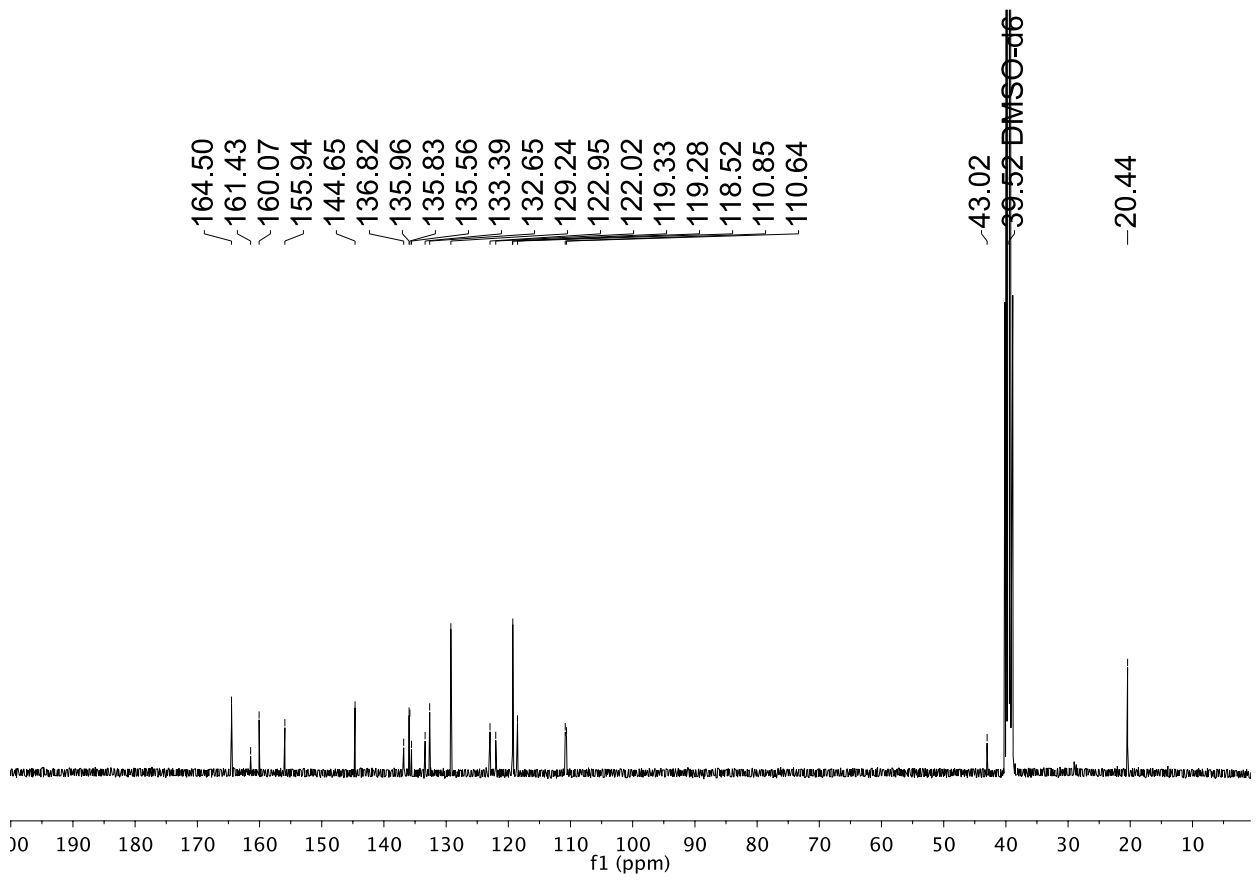

Compound (10)  $^1\text{H}$  NMR (400 MHz,  $\text{DMSO-}d_6$ )

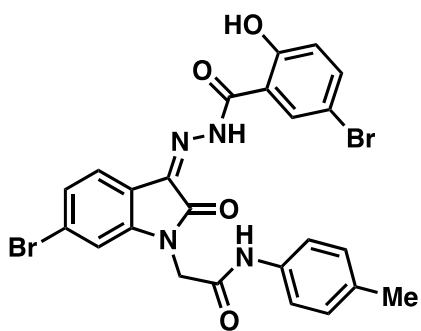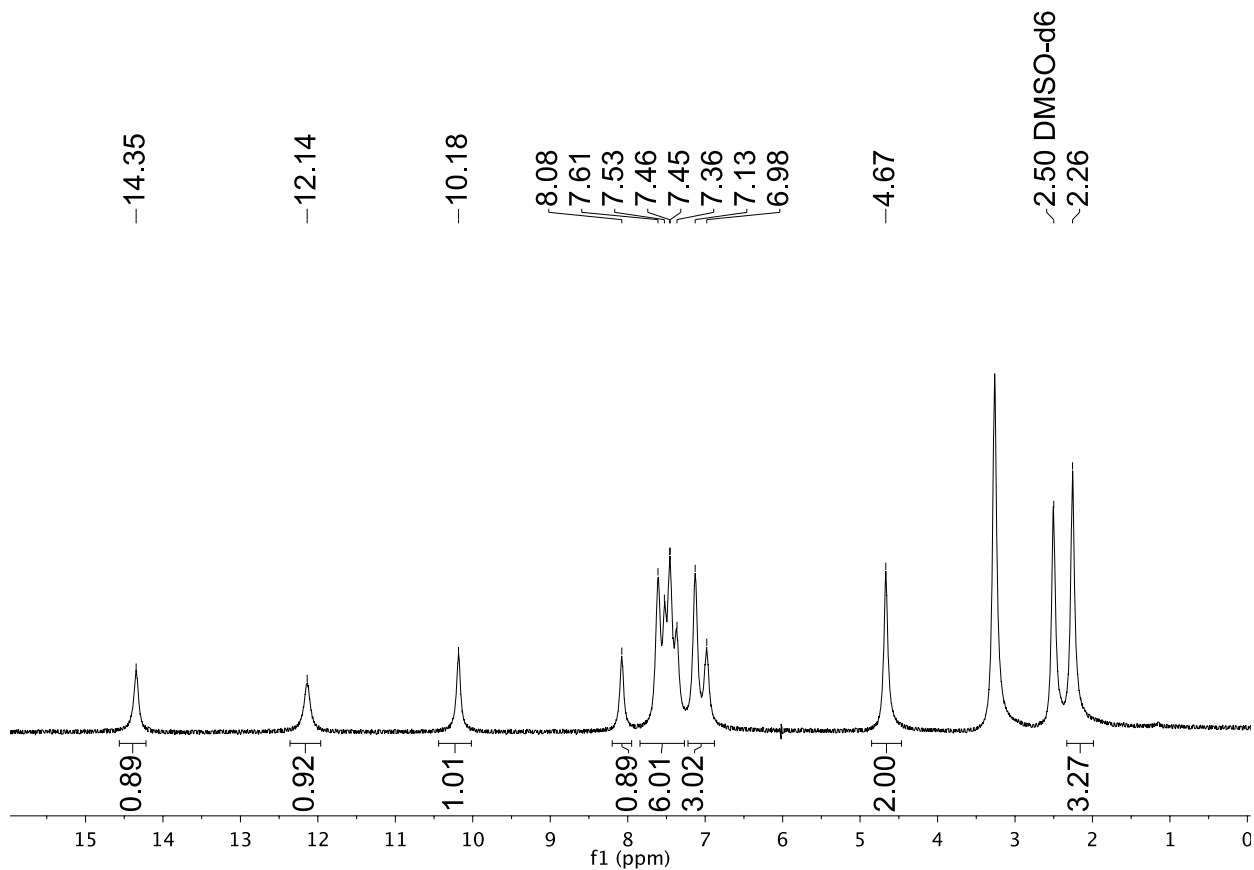

Compound (10) <sup>13</sup>C NMR (101 MHz, DMSO-d<sub>6</sub>)

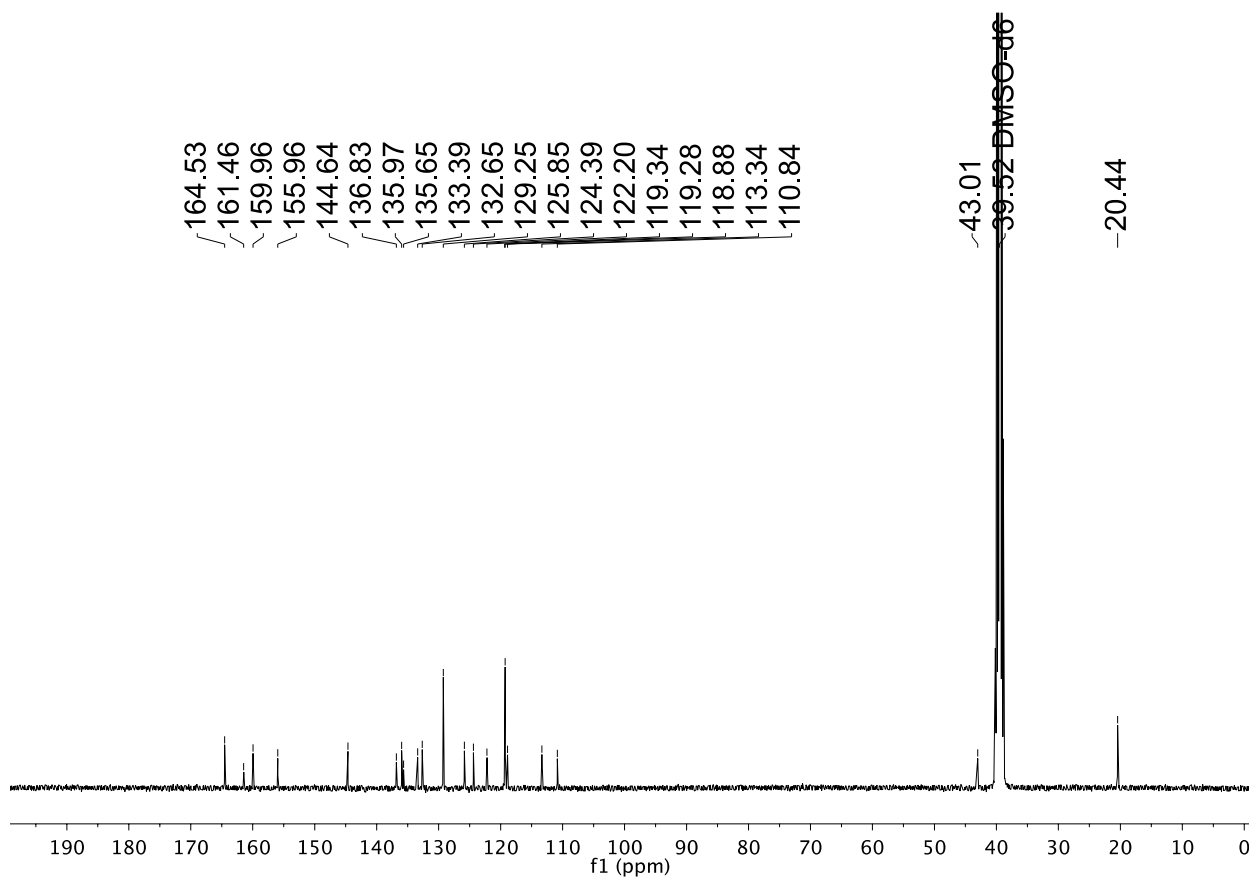

Compound (25) <sup>1</sup>H NMR (400 MHz, DMSO-d<sub>6</sub>)

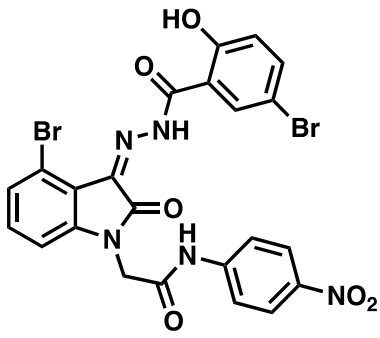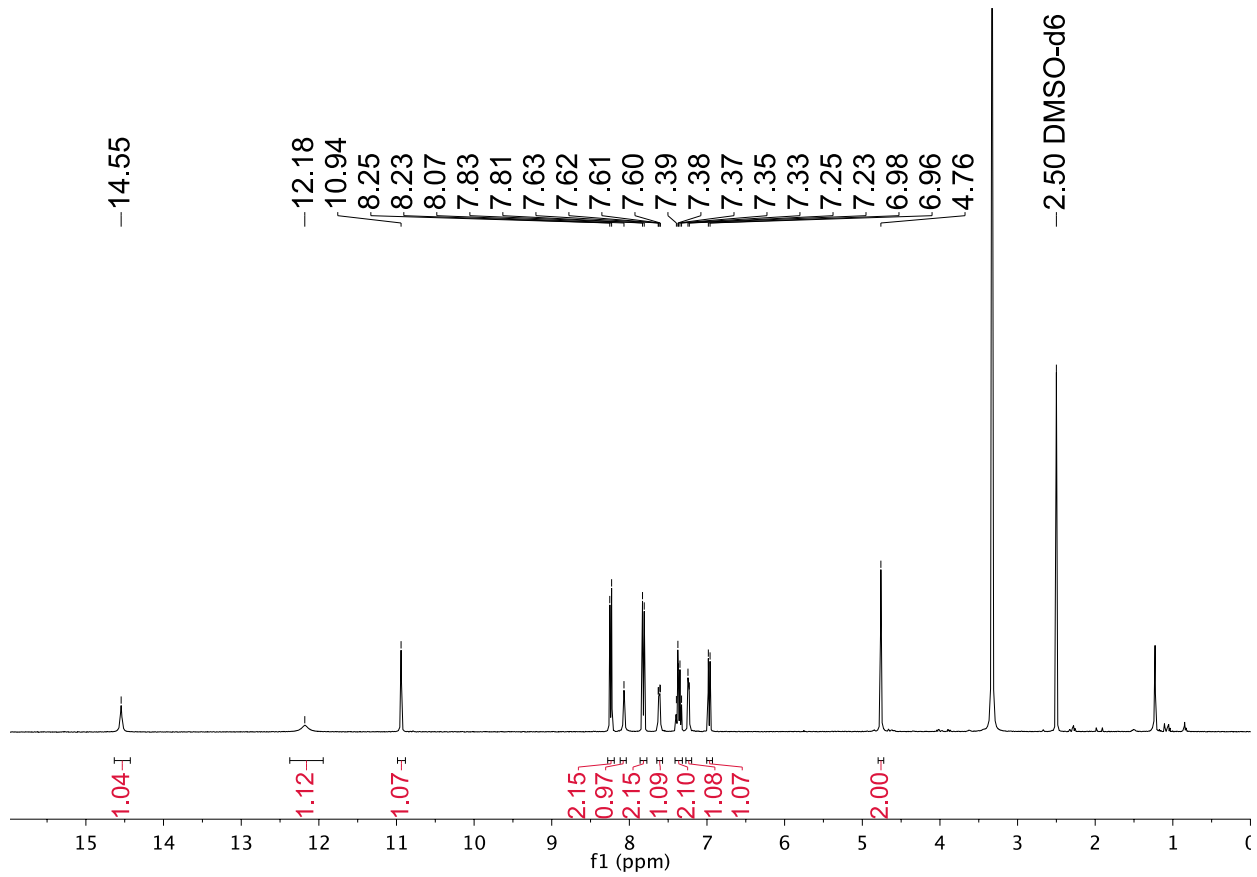

Compound (25)  $^{13}\text{C}$  NMR (101 MHz,  $\text{DMSO-}d_6$ )

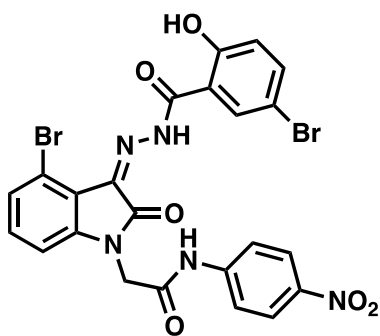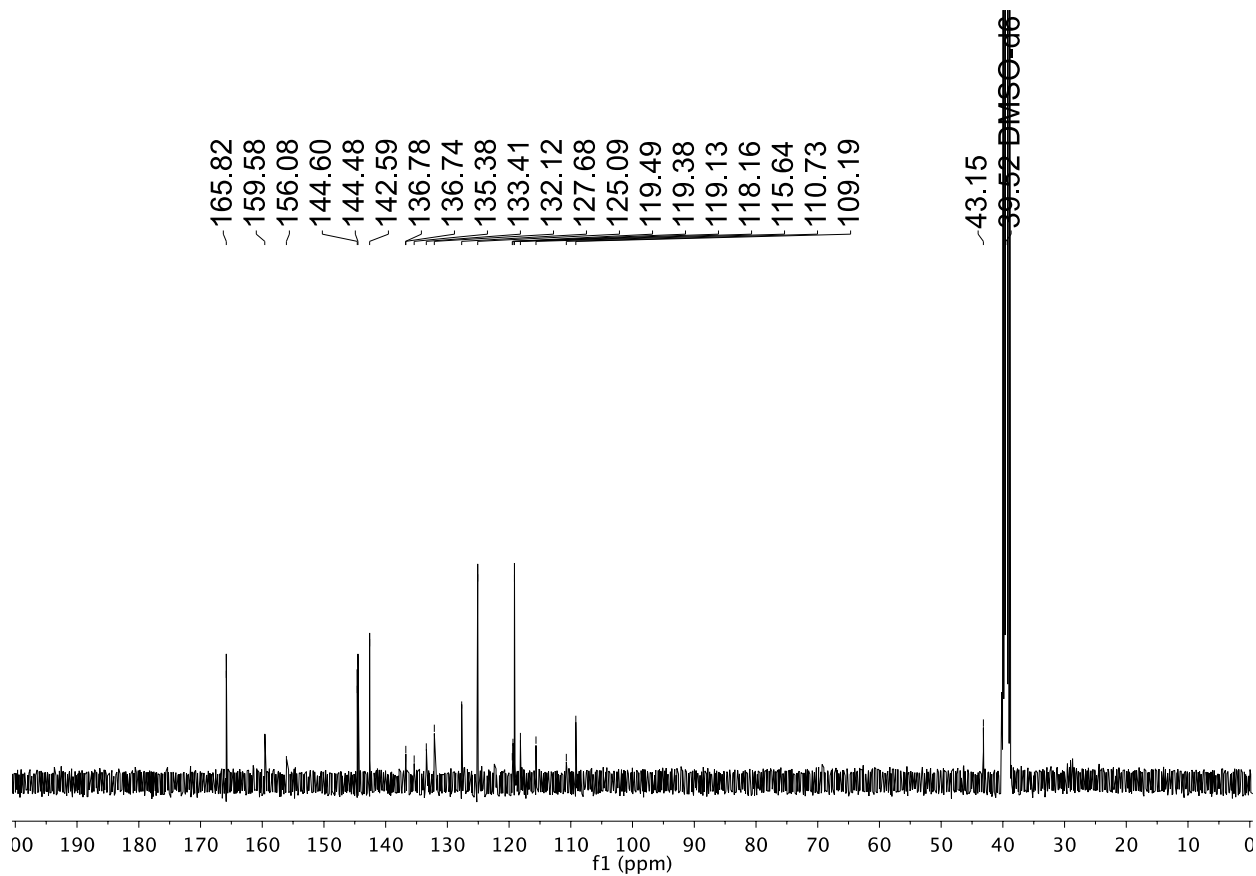

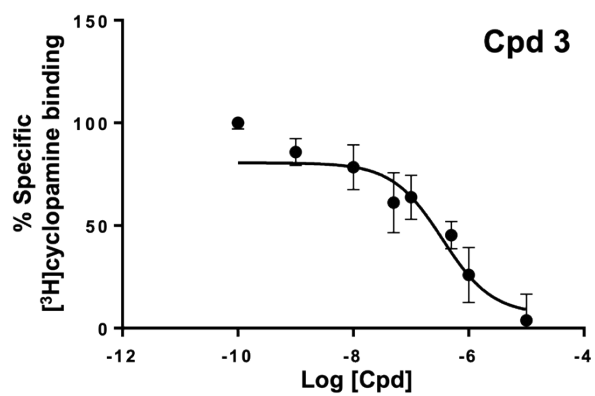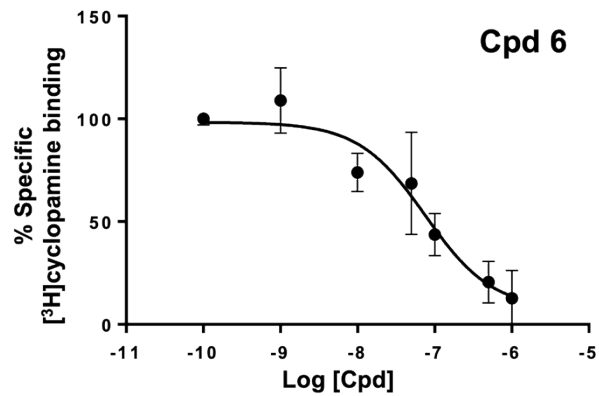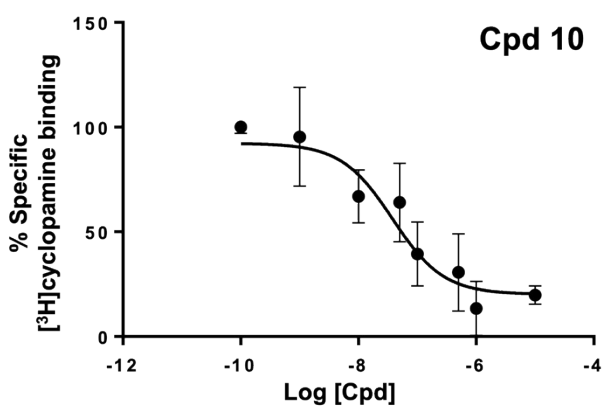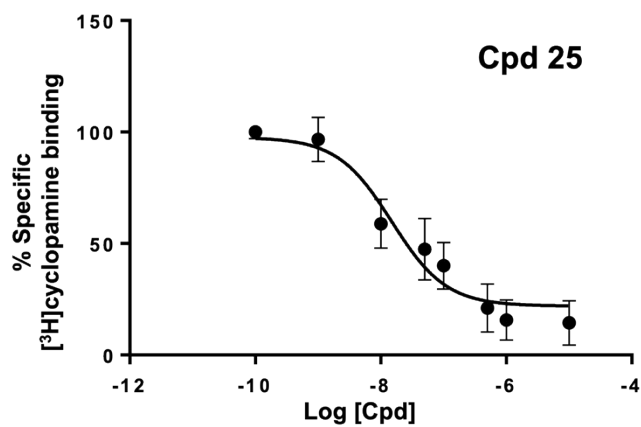

Figure S4. SMO binding curves of compounds 3, 6, 10, and 25.

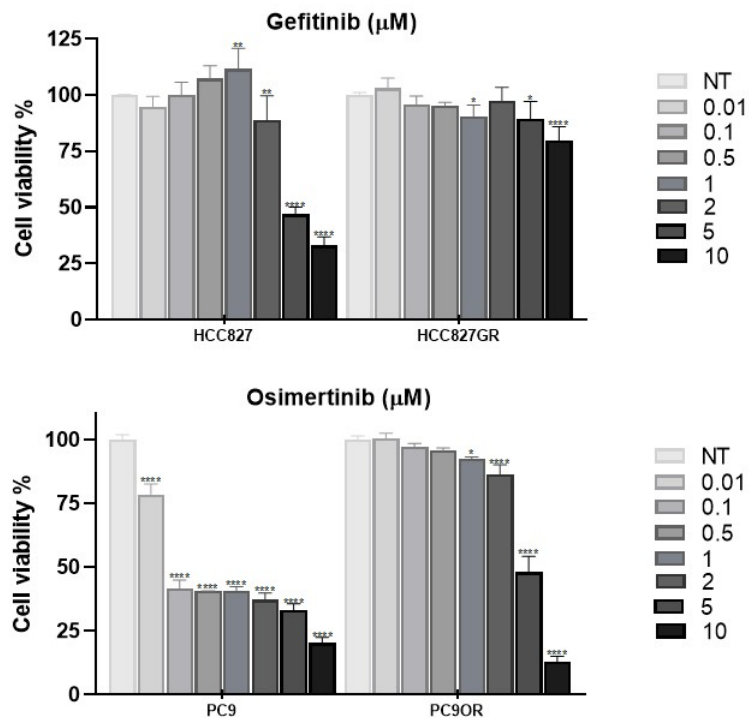

| $\text{IC}_{50}$ ( $\mu\text{M}$ ) $\pm$ SD | HCC827          | HCC827GR         | PC9             | PC9OR           |
|---------------------------------------------|-----------------|------------------|-----------------|-----------------|
| <b>Gefitinib</b>                            | 5.98 $\pm$ 0.11 | 83.94 $\pm$ 6.21 | -               | -               |
| <b>Osimertinib</b>                          | -               | -                | 0.18 $\pm$ 0.06 | 4.81 $\pm$ 0.51 |

**Figure S5.** MTT Cell viability Assay with increasing concentrations of respective TKI (gefitinib for HCC827-GR and osimertinib for PC9-OR). Table shows the  $\text{IC}_{50}$  values for parental versus resistant NSCLC cell lines. Data are presented as mean of three biological replicates and four technical replicates  $\pm$  SD. Statistical significance \*\* $p < 0.01$ , \*\*\* $p < 0.001$  and \*\*\*\* $p < 0.0001$ .



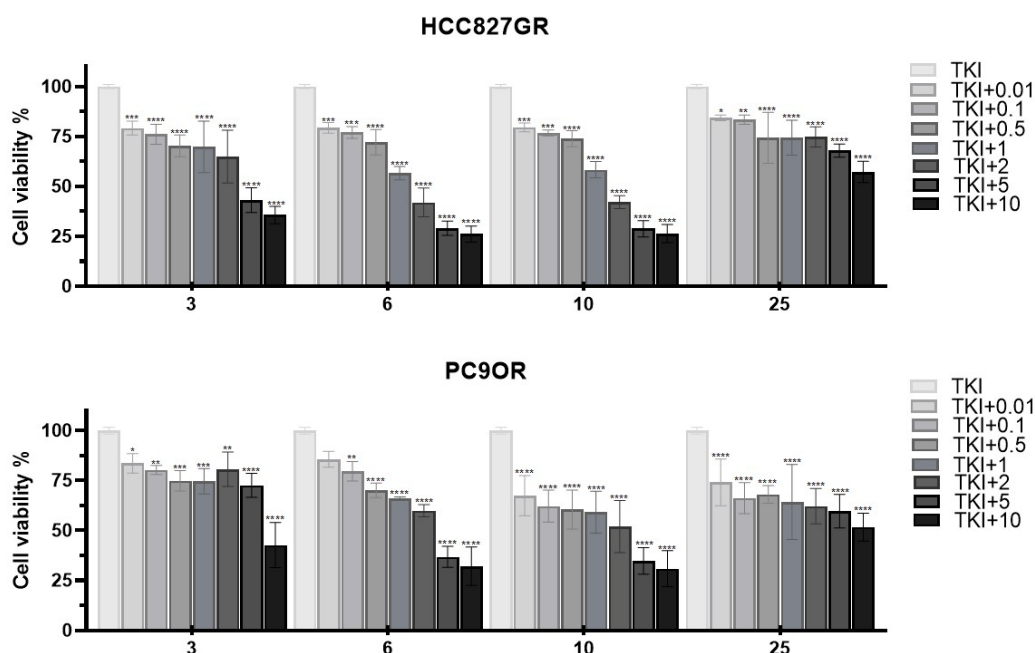

| IC <sub>50</sub> (μM) ± SD | TKI + 3      | TKI + 6     | TKI + 10    | TKI + 25     |
|----------------------------|--------------|-------------|-------------|--------------|
| HCC827-GR                  | 5.61 ± 0.61  | 1.89 ± 0.53 | 2.10 ± 0.34 | 22.24 ± 1.76 |
| PC9-OR                     | 10.80 ± 1.51 | 3.57 ± 0.52 | 1.03 ± 0.62 | 11.74 ± 1.11 |

**Figure S6.** MTT Cell viability Assay with increasing concentrations of compounds (**3**, **6**, **10**, **25**) in combination with IC<sub>50</sub> value dose for respective TKI (gefitinib for HCC827-GR and osimertinib for PC9-OR). Table shows the IC<sub>50</sub> values of the compound in combination with gefitinib or osimertinib for HCC827-GR and PC9-OR cell lines, respectively. Data are presented as mean of three biological replicates and four technical replicates ± SD. Statistical significance\*\*p<0.01, \*\*\*p< 0.001 and \*\*\*\*p<0.0001.

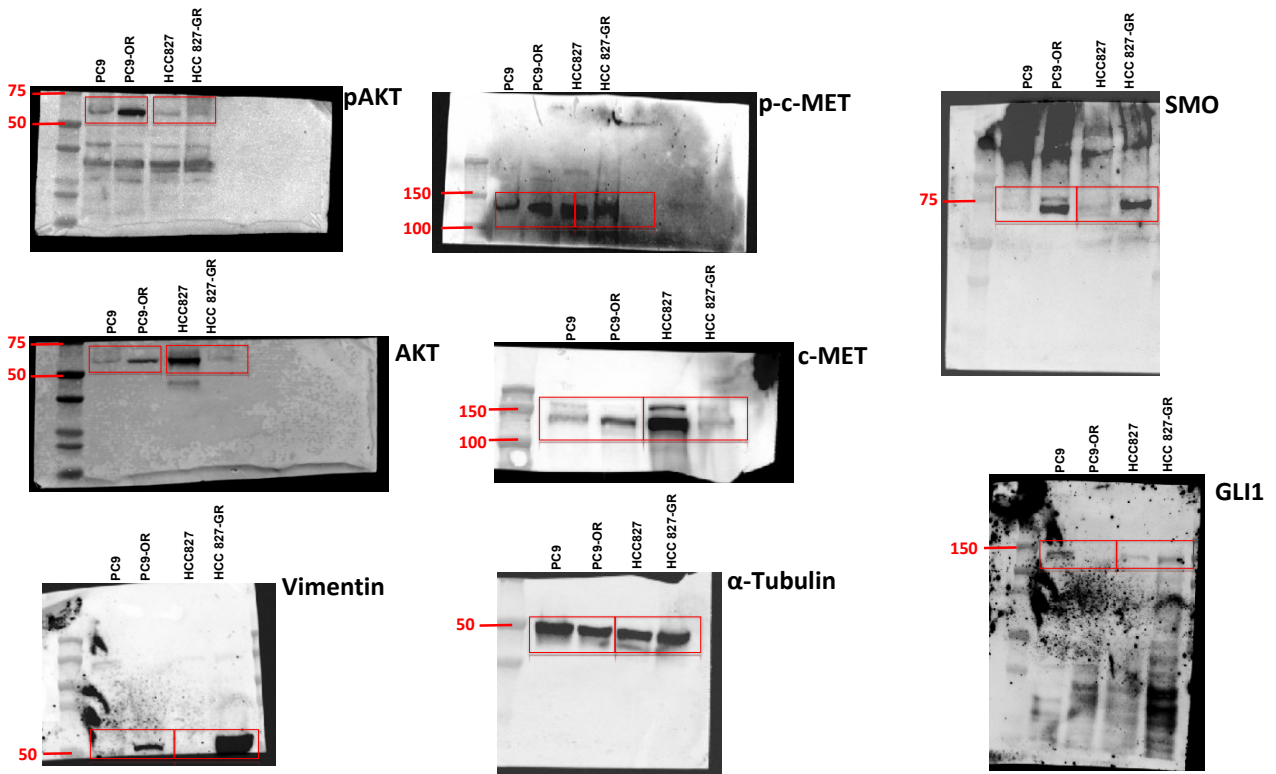

**Figure S7.** Western Blot raw gels for Figure 4 in the main text.

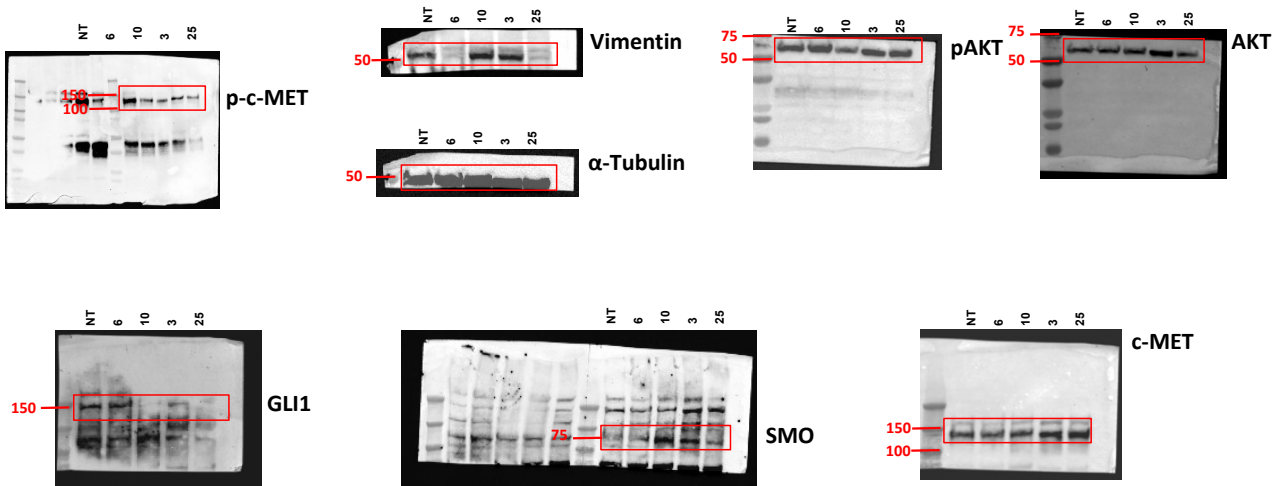

**Figure S8.** Western Blot raw gels using HCC827-GR cell lines for Figure 6 in the main text.

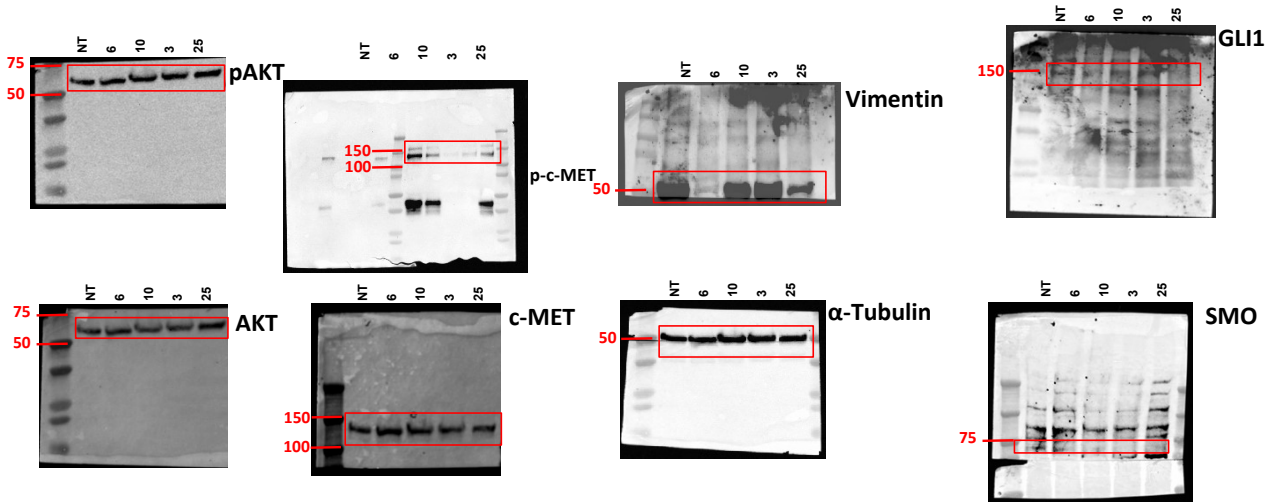

**Figure S9.** Western Blot raw gels using PC9-OR cell lines for Figure 6 in the main text.

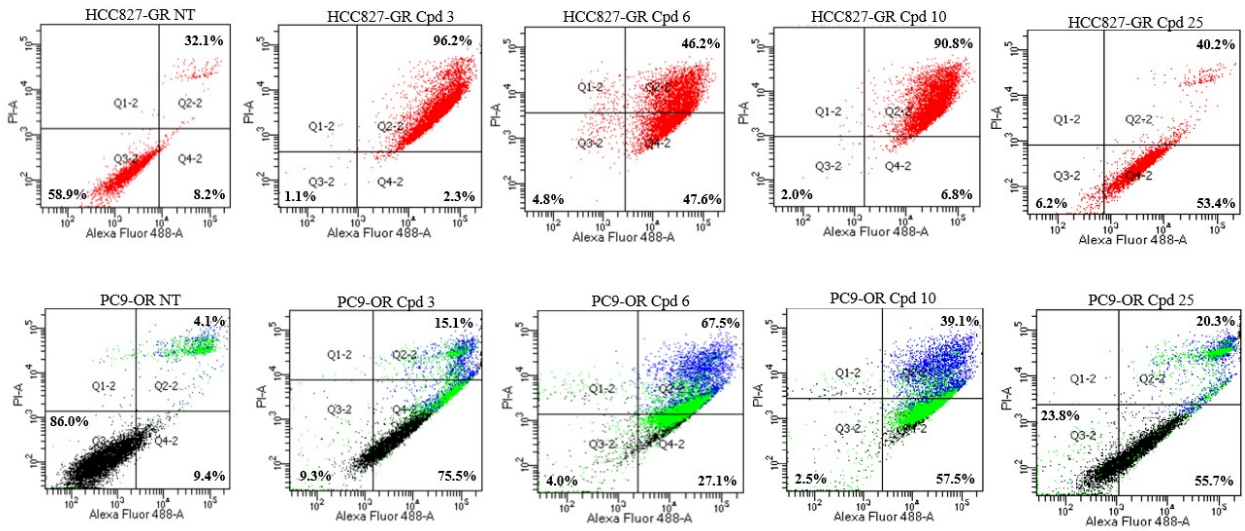

**Figure S10.** Annexin V/Propidium Iodide Apoptosis assay of Figure 7 in the main text.

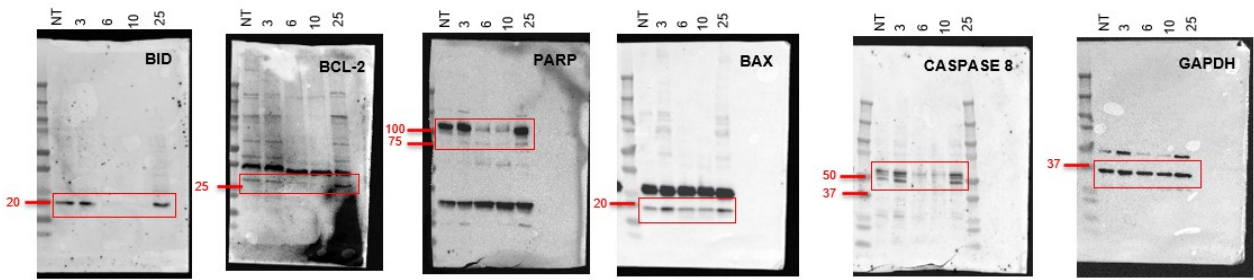

**Figure S11.** Western Blot raw gels using PC9-OR cell lines for Figure 7 in the main text.

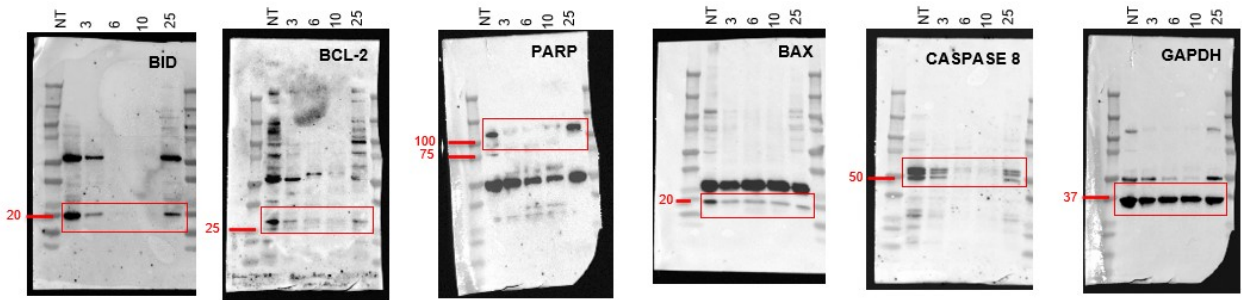

**Figure S12.** Western Blot raw gels using HCC827-GR cell lines for Figure 7 in the main text.
